# Supplementary material
Source: PubMed Central journal article supplement (PMC6625318)

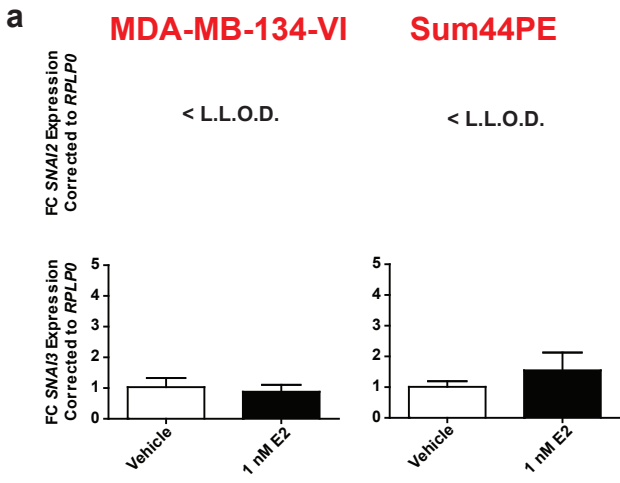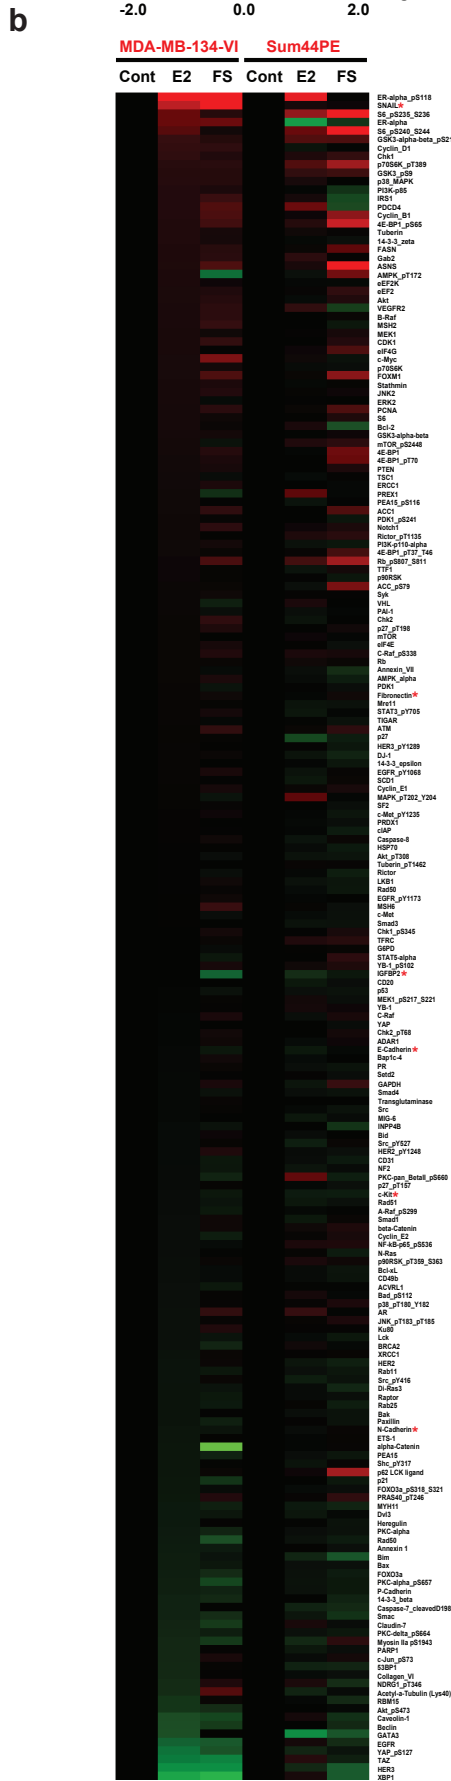

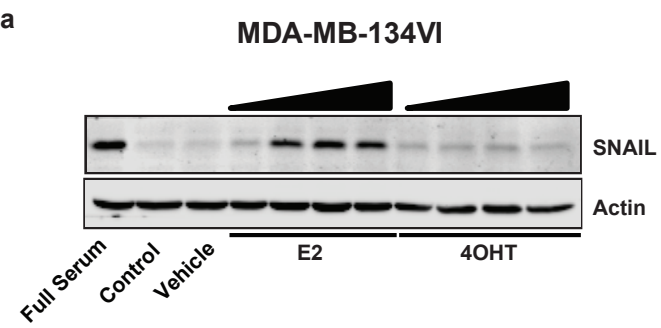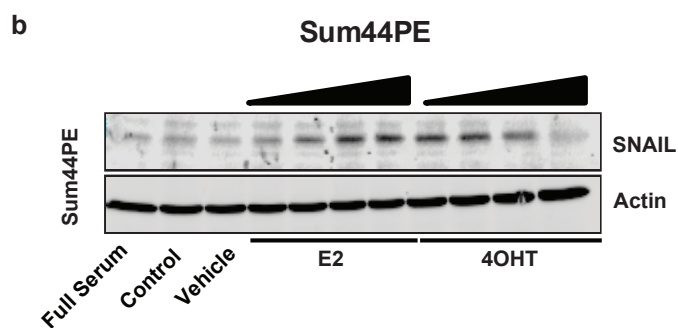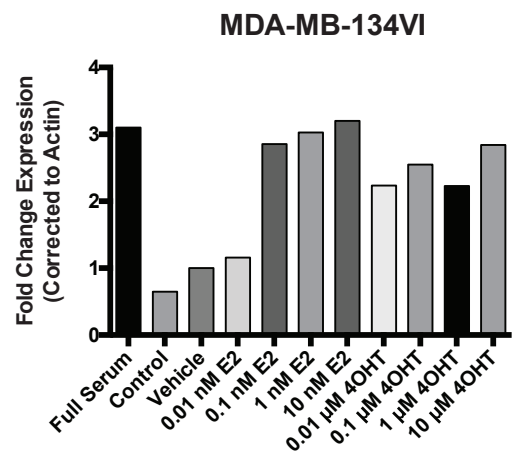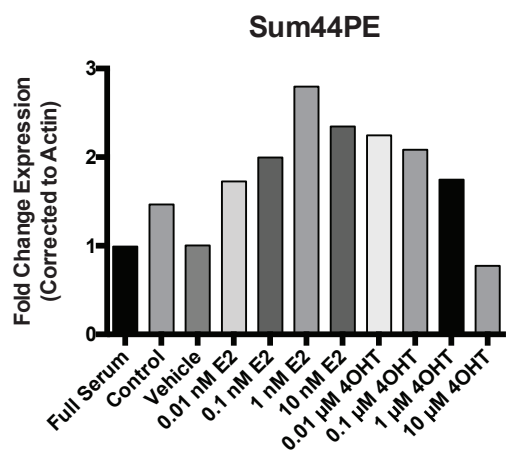

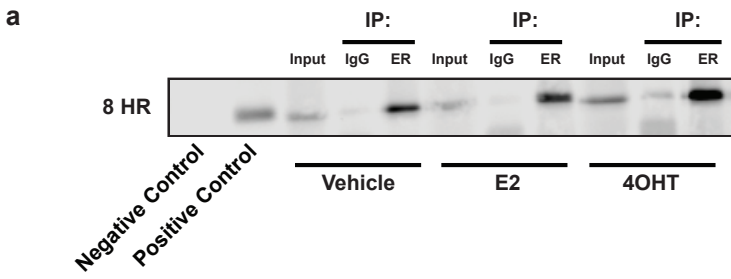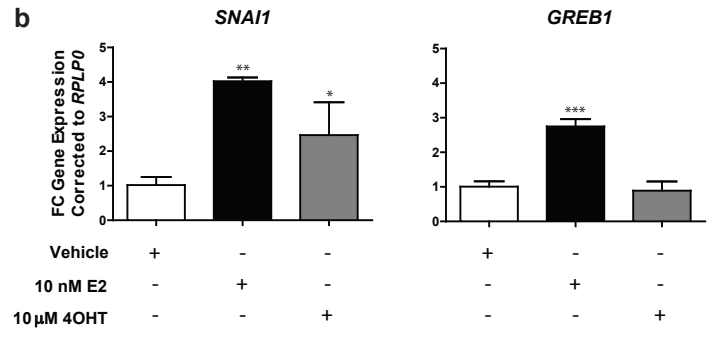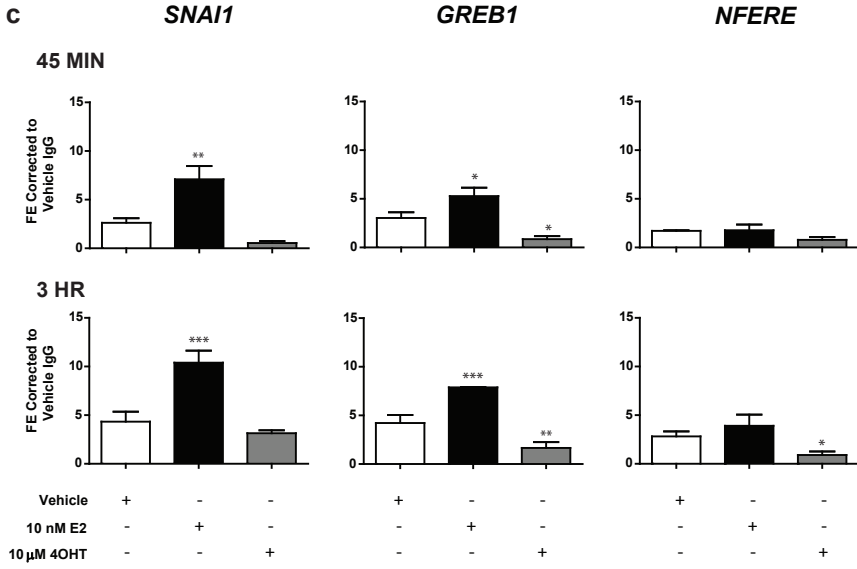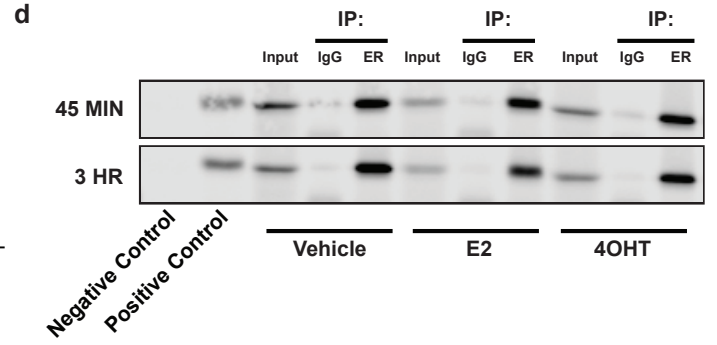

a

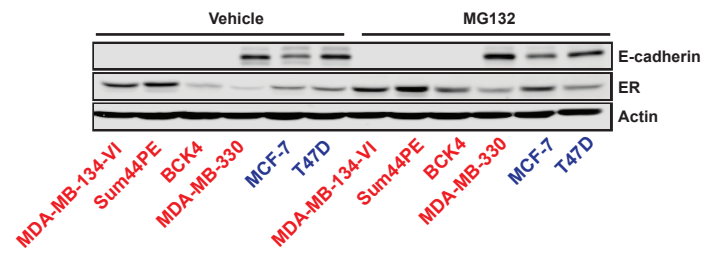

b

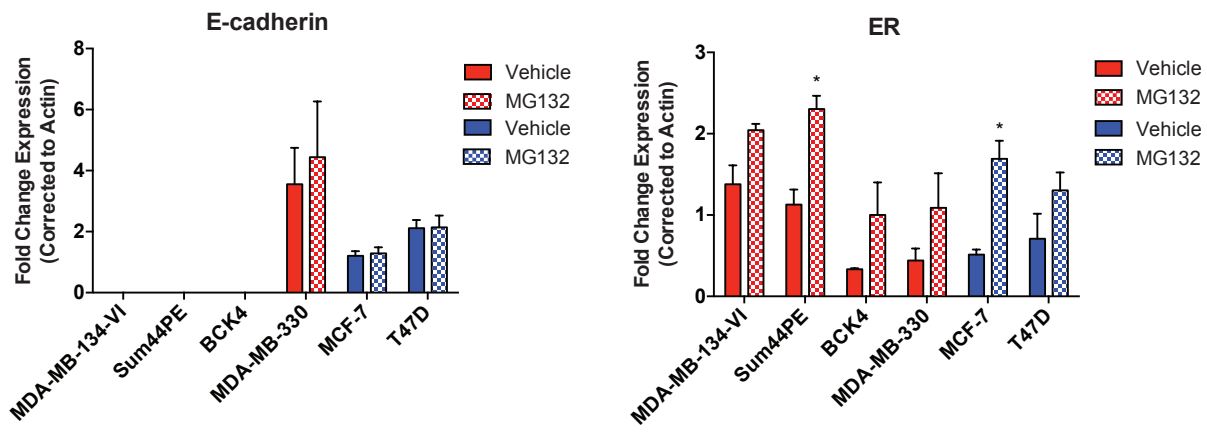

a

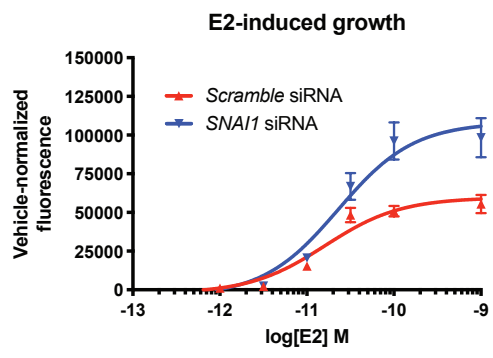

b

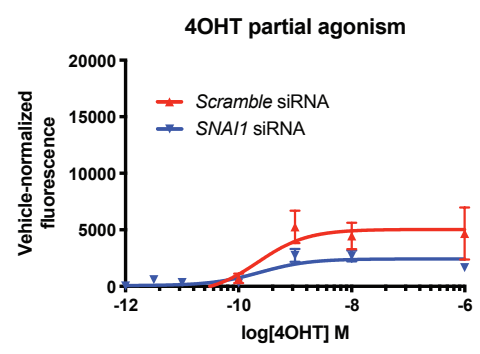

a

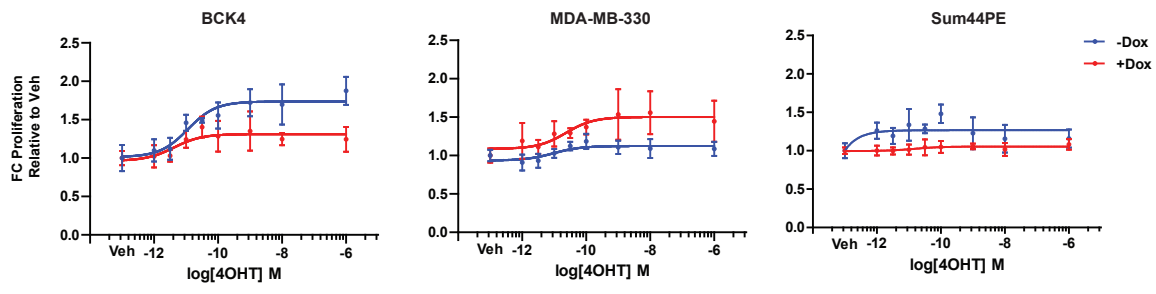

b

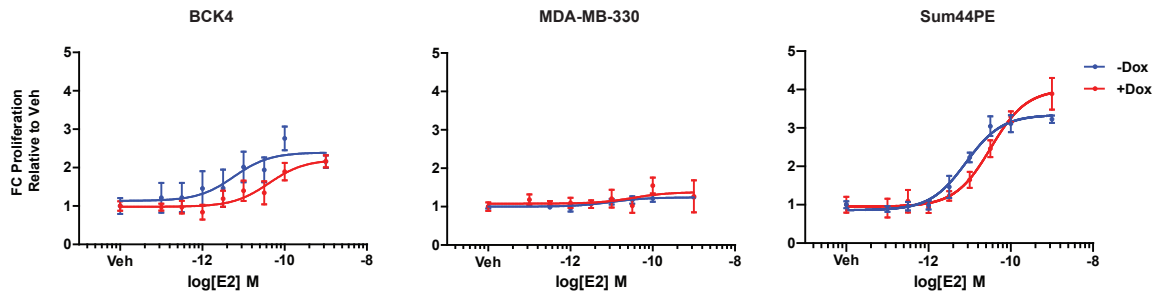

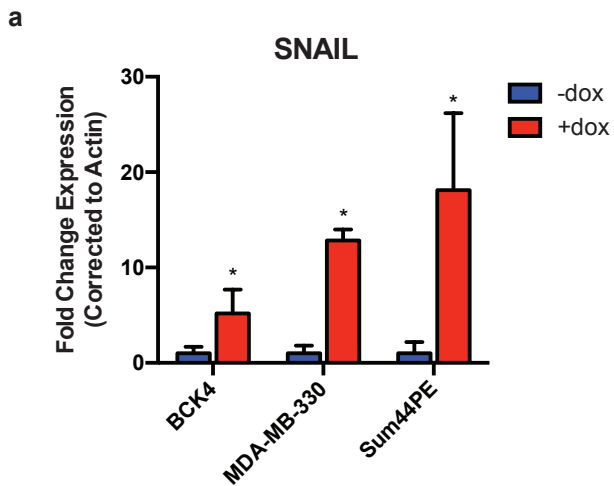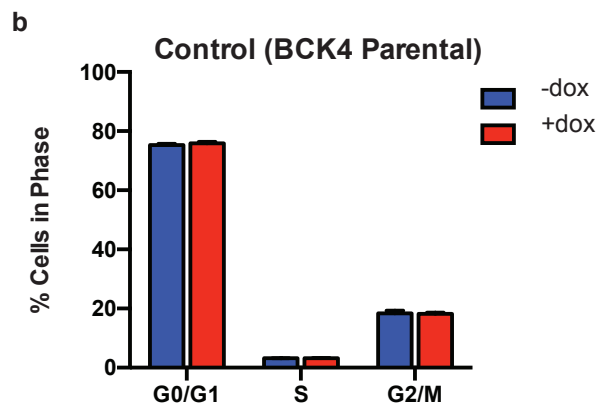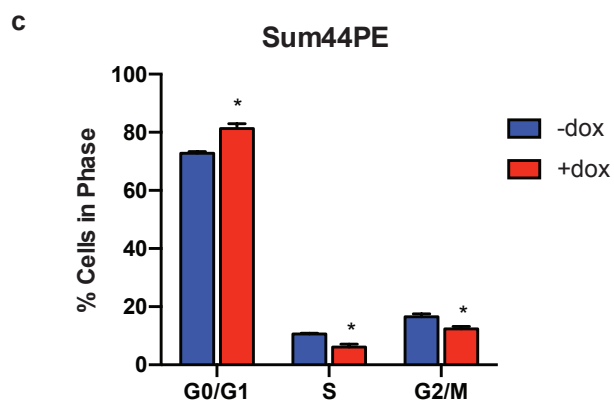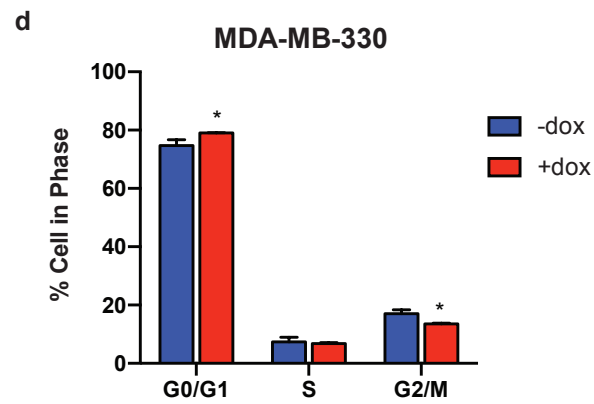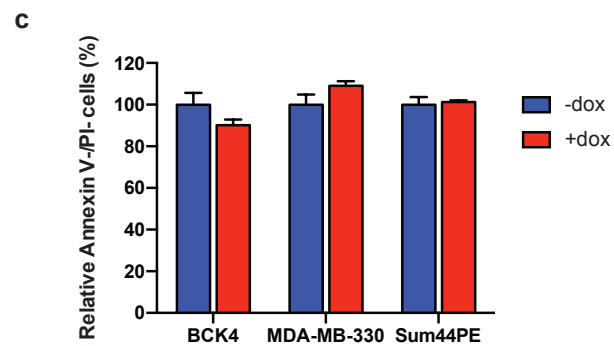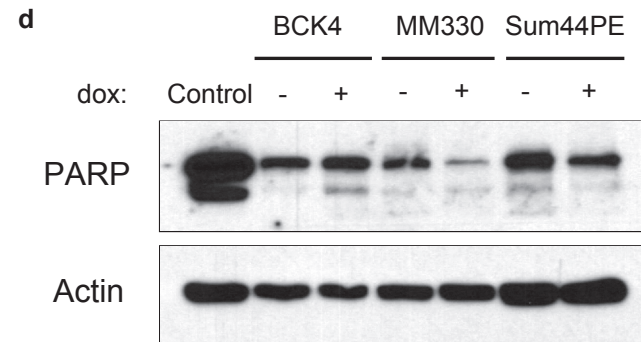

MCF-7

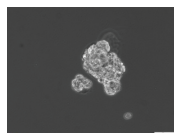

BCK4

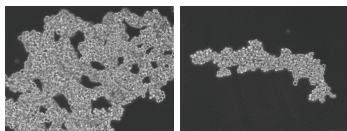

MDA-MB-330

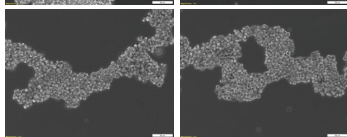

0.5  $\mu$ g/mL Dox: - +

Supplement: NIHMS1522544-supplement-Supplemental_figures.pdf [file NIHMS1522544-supplement-Supplemental_figures.pdf]
